# Supplementary material for: One-year effect of wearing orthokeratology lenses on the visual quality of juvenile myopia: a retrospective study
Source: PeerJ. 2019 May 30;7:e6998. doi: 10.7717/peerj.6998 (PMC6545229; doi:10.7717/peerj.6998)
Supplement: Data S1 [file peerj-07-6998-s001.xlsx]

## Sheet: Sheet1
No.	Medical record No.	Age	Sex	iTrace number	Right Eye	Spherical Diopter	Cylinder Diopter	Vision acuity	SR（total）4mm			MTF（total）4mm			MTF of internal optic（total）4mm						MTF of cornea（total）4mm						MTF of ocular（total）4mm						Q value	e value	total aberration(um)			Total low aberration			defocus			astigmatism（total）			HO total
									internal optic	cornea	ocular	internal optic	cornea	ocular	MTF5	MTF10	MTF15	MTF20	MTF25	MTF30	MTF5	MTF10	MTF15	MTF20	MTF25	MTF30	MTF5	MTF10	MTF15	MTF20	MTF25	MTF30			internal optic	cornea	ocular	internal optic	cornea	ocular	internal optic	cornea	ocular	internal optic	cornea	ocular	internal optic	cornea	ocular
1	172	13	M	176	before OK	-4	-1.5	0.2	0.0002	0.01144	0.00019	0.044	0.157	0.042	0.01	0.005	0.002	0.001	0.001	0.001	0.24	0.077	0.045	0.027	0.022	0.014	0.009	0.003	0.002	0.001	0.001	0.001	-0.17	0.41	2.73	0.935	3.053	2.727	0.92	3.05	2.726	0.181	2.907	0.171	0.283	0.113	0.125	0.17	0.14
					1 month				0.05254	0.02756	0.05785	0.226	0.188	0.218	0.317	0.205	0.12	0.094	0.066	0.058	0.267	0.128	0.065	0.045	0.035	0.019	0.363	0.212	0.129	0.078	0.047	0.032	1.23	0.74	0.468	0.649	0.764	0.425	0.622	0.746	0.364	0.144	0.508	0.936	1.321	0.425	0.195	0.186	0.165
					3 months				0.07166	0.01801	0.0676	0.358	0.225	0.222	0.517	0.377	0.24	0.11	0.07	0.049	0.362	0.225	0.075	0.049	0.037	0.034	0.344	0.197	0.119	0.082	0.064	0.053	0.18	0.39	0.49	0.925	0.729	0.382	0.863	0.672	-0.09	0.755	0.666	0.453	0.783	0.402	0.307	0.333	0.284
					12 months	-0.25	-0.5	1.5	0.116	0.01951	0.0363	0.42	0.181	0.204	0.685	0.433	0.346	0.261	0.199	0.15	0.297	0.132	0.091	0.055	0.036	0.028	0.322	0.173	0.101	0.07	0.058	0.044	0.82	0.67	0.27	1.082	1.177	0.152	1.043	1.136	0.073	0.621	0.694	0.358	0.546	0.188	0.223	0.288	0.309
2	176	10	F	202	before OK	-1	0	0.4	0.00318	0.02476	0.00198	0.11	0.245	0.087	0.105	0.03	0.016	0.01	0.007	0.006	0.555	0.185	0.076	0.053	0.048	0.036	0.049	0.012	0.006	0.004	0.004	0.003	-0.38	0.62	0.922	0.488	1.015	0.919	0.485	1.013	0.85	0.156	1.006	0.33	0.722	0.393	0.078	0.055	0.074
					1 month				0.00971	0.02294	0.0014	0.122	0.179	0.063	0.168	0.073	0.044	0.029	0.02	0.015	0.286	0.162	0.094	0.049	0.03	0.023	0.048	0.009	0.003	0.001	0.001	0.001	0.05	0.22	1.096	1.194	2.056	1.074	1.136	2.036	1.048	0.95	1.998	0.426	0.543	0.487	0.215	0.367	0.286
					3 months				0.02887	0.0207	0.10016	0.222	0.183	0.333	0.423	0.166	0.09	0.062	0.047	0.038	0.322	0.157	0.067	0.042	0.037	0.032	0.548	0.363	0.229	0.16	0.136	0.124	-0.16	0.4	0.634	0.925	0.443	0.611	0.869	0.351	-0.42	0.759	0.339	0.62	0.637	0.328	0.171	0.318	0.271
					12 months	0	-0.25	1	0.00094	0.0478	0.00095	0.071	0.35	0.07	0.033	0.013	0.007	0.004	0.003	0.003	0.718	0.346	0.204	0.15	0.109	0.086	0.032	0.01	0.006	0.004	0.003	0.002	-0.28	0.53	1.472	0.325	1.448	1.46	0.303	1.442	1.46	-0.047	1.413	0.654	0.746	0.718	0.188	0.117	0.1
3	177	13	F	206	before OK	-1	-0.75	0.1	0.00189	0.02719	0.00083	0.081	0.211	0.067	0.061	0.022	0.013	0.009	0.006	0.004	0.403	0.136	0.089	0.056	0.035	0.03	0.029	0.009	0.005	0.004	0.002	0.002	-0.1	0.32	1.352	0.677	1.613	1.348	0.667	1.605	1.332	0.214	1.546	0.123	0.258	0.137	0.111	0.115	0.157
					1 month				0.0114	0.01374	0.02417	0.143	0.148	0.217	0.134	0.074	0.055	0.033	0.038	0.029	0.102	0.098	0.064	0.05	0.034	0.029	0.429	0.124	0.1	0.064	0.047	0.046	0.66	0.64	1.074	1.223	0.47	0.858	0.983	0.363	-0.593	0.749	0.156	0.309	0.631	0.51	0.647	0.728	0.298
					3 months				0.01298	0.01288	0.01748	0.15	0.179	0.168	0.23	0.078	0.038	0.031	0.026	0.022	0.337	0.071	0.061	0.034	0.024	0.023	0.264	0.127	0.069	0.045	0.028	0.016	-0.16	0.4	0.835	0.721	1.074	0.76	0.714	1.019	0.712	0.217	0.928	0.333	0.128	0.281	0.345	0.1	0.339
					12 months	0	-0.5	1.5	0.08237	0.01791	0.15062	0.351	0.189	0.402	0.685	0.254	0.25	0.186	0.125	0.128	0.368	0.107	0.05	0.045	0.039	0.029	0.581	0.416	0.333	0.272	0.225	0.185	-0.11	0.33	0.365	0.834	0.545	0.344	0.805	0.501	-0.077	0.446	0.369	0.662	0.348	0.339	0.12	0.218	0.214
4	194	14	F	237	before OK	-5	-1.25	0.1	0.00018	0.00945	0.00017	0.041	0.169	0.039	0.011	0.004	0.002	0.001	0.001	0.001	0.324	0.087	0.054	0.028	0.018	0.014	0.007	0.002	0.001	0.001	0.001	0	-0.39	0.62	3.154	1.03	3.582	3.147	1.014	3.564	3.126	0.391	3.517	0.459	0.538	0.104	0.201	0.18	0.352
					1 month				0.00252	0.00158	0.00716	0.074	0.058	0.091	0.07	0.032	0.022	0.015	0.012	0.01	0.046	0.017	0.011	0.007	0.008	0.006	0.09	0.045	0.027	0.019	0.016	0.013	1.99	0.82	2.497	4.917	2.967	2.012	3.885	2.09	-0.922	2.771	1.849	0.499	0.549	0.09	1.479	3.014	2.093
					3 months				0.00488	0.00912	0.01432	0.113	0.118	0.159	0.091	0.054	0.037	0.026	0.021	0.018	0.125	0.085	0.041	0.032	0.021	0.019	0.264	0.087	0.065	0.053	0.04	0.031	0.78	0.66	1.264	2.472	1.579	1.153	2.238	1.241	0.688	1.88	1.192	0.755	0.61	0.562	0.52	1.05	0.976
					12 months	-0.5	-0.25	1.2	0.00215	0.00644	0.00293	0.067	0.094	0.077	0.05	0.026	0.016	0.011	0.008	0.006	0.1	0.051	0.032	0.025	0.02	0.018	0.072	0.03	0.02	0.014	0.012	0.012	1.51	0.78	4.982	4.281	1.689	4.613	3.688	0.973	-4.119	3.172	-0.947	0.309	0.703	0.395	1.88	2.175	1.381
5	184	12	F	253	before OK	-2.5	0	0.2	0.00067	0.09956	0.00046	0.061	0.389	0.053	0.029	0.01	0.006	0.004	0.003	0.002	0.686	0.438	0.293	0.203	0.141	0.104	0.011	0.005	0.002	0.002	0.002	0.001	0.11	0.31	1.866	0.358	2.01	1.859	0.342	2.006	1.841	0.161	2.002	0.51	0.336	0.181	0.162	0.108	0.125
					1 month				0.00897	0.00214	0.00341	0.105	0.067	0.074	0.129	0.061	0.029	0.022	0.02	0.019	0.044	0.024	0.016	0.012	0.009	0.008	0.051	0.028	0.016	0.013	0.01	0.007	1.45	0.77	1.773	3.868	3.957	1.26	2.778	3.556	1.016	2.737	3.389	0.602	0.339	0.557	1.247	2.691	1.734
					3 months				0.01583	0.02328	0.01236	0.156	0.189	0.128	0.216	0.115	0.06	0.035	0.026	0.021	0.28	145	0.081	0.058	0.049	0.038	0.179	0.084	0.05	0.035	0.026	0.02	-0.01	0.1	1.015	0.777	1.577	0.961	0.714	1.471	0.863	0.583	1.446	0.769	0.687	0.4	0.329	0.306	0.558
					12 months	0	0	1	0.01544	0.02579	0.03029	0.152	0.22	0.179	0.189	0.089	0.057	0.041	0.031	0.025	0.368	0.141	0.127	0.072	0.069	0.055	0.244	0.153	0.108	0.076	0.055	0.04	0.4	0.53	0.794	0.638	1.139	0.773	0.568	1.098	0.714	0.329	1.043	0.263	0.181	0.371	0.18	0.291	0.303
6	187	8	F	264	before OK	-2	0	0.2	0.00126	0.06291	0.00105	0.084	0.339	0.066	0.051	0.02	0.011	0.007	0.005	0.003	0.65	0.361	0.199	0.133	0.113	0.096	0.025	0.006	0.004	0.003	0.002	0.002	0.33	0.5	1.22	0.371	1.414	1.214	0.35	1.412	1.202	0.206	1.408	0.534	0.562	0.078	0.118	0.124	0.077
					1 month				0.01125	0.00709	0.01001	0.113	0.104	0.138	0.116	0.064	0.046	0.028	0.023	0.018	0.12	0.041	0.034	0.027	0.02	0.015	0.135	0.064	0.052	0.035	0.03	0.022	-0.04	0.2	1.332	1.938	1.316	0.936	1.572	0.942	-0.011	0.852	0.84	1.065	1.563	0.502	0.948	1.134	0.919
					3 months				0.02487	0.0265	0.04206	0.203	0.198	0.237	0.317	0.164	0.071	0.045	0.052	0.042	0.375	0.141	0.093	0.064	0.045	0.043	0.389	0.24	0.148	0.088	0.071	0.064	-0.23	0.48	0.543	1.272	1.056	0.453	1.133	0.925	0.015	0.819	0.833	0.243	0.611	0.387	0.299	0.578	0.508
					12 months	-0.25	0	1	0.02097	0.02719	0.01431	0.191	0.188	0.139	0.282	0.139	0.069	0.046	0.061	0.041	0.328	0.11	0.095	0.081	0.049	0.038	0.182	0.1	0.067	0.044	0.027	0.014	-0.09	0.3	0.586	1.183	1.294	0.488	1.05	1.243	0.332	0.896	1.229	0.192	0.329	0.497	0.324	0.545	0.359
7	189	11	M	291	before OK	-3.25	-0.75	0.3	0.00074	0.01633	0.00041	0.062	0.194	0.052	0.032	0.011	0.005	0.003	0.002	0.002	0.38	0.112	0.057	0.055	0.033	0.021	0.01	0.004	0.002	0.002	0.001	0.001	-0.29	0.54	1.866	0.809	2.218	1.861	0.798	2.206	1.832	0.339	2.171	0.329	0.575	0.246	0.139	0.133	0.228
					1 month				0.01652	0.02239	0.02486	0.161	0.201	0.182	0.182	0.084	0.063	0.047	0.04	0.031	0.395	0.129	0.086	0.046	0.039	0.035	0.213	0.142	0.097	0.074	0.054	0.035	1.94	0.81	0.657	0.74	0.749	0.453	0.618	0.5	-0.181	0.295	0.114	0.446	0.781	0.435	0.466	0.407	0.557
					3 months				0.0114	0.01374	0.02417	0.143	0.148	0.217	0.134	0.074	0.055	0.033	0.038	0.029	0.102	0.098	0.064	0.05	0.034	0.029	0.429	0.124	0.1	0.064	0.047	0.046	0.66	0.64	1.074	1.223	0.47	0.858	0.983	0.363	-0.593	0.749	0.156	0.157	0.436	0.289	0.647	0.728	0.298
					12 months	-0.75	0	1.2	0.03938	0.01193	0.03267	0.214	0.143	0.213	0.292	0.192	0.14	0.106	0.081	0.06	0.235	0.082	0.039	0.028	0.024	0.02	0.414	0.1	0.129	0.078	0.051	0.041	0.71	0.64	0.966	1.218	1.032	0.761	1.171	0.773	-0.39	0.903	0.883	0.687	0.855	0.176	0.596	0.334	0.534
8	198	8	F	332	before OK	-4.25	0	0.2	0.00046	0.07167	0.00026	0.053	0.311	0.044	0.022	0.008	0.004	0.003	0.002	0.001	0.55	0.302	0.202	0.14	0.103	0.077	0.007	0.003	0.002	0.001	0.001	0.001	-0.12	0.35	2.325	0.407	2.631	2.321	0.4	2.627	2.318	0.306	2.623	0.205	0.413	0.211	0.144	0.078	0.141
					1 month				0.00074	0.00733	0.00159	0.047	0.15	0.059	0.021	0.005	0.002	0.001	0.001	0	0.143	0.006	0.043	0.031	0.023	0.02	0.047	0.013	0.004	0.001	0.001	0.001	-0.3	0.55	3.338	0.77	3.178	3.306	0.675	3.095	3.292	-0.239	3.053	0.192	0.279	0.224	0.459	0.37	0.722
					3 months				0.00023	0.02429	0.0015	0.042	0.193	0.063	0.009	0.003	0.001	0.001	0.001	0.001	0.293	0.129	0.096	0.067	0.046	0.039	0.048	0.023	0.013	0.008	0.005	0.003	-0.6	0.77	3.359	0.664	3.208	3.339	0.264	2.104	3.322	-0.231	3.091	0.226	0.457	0.239	0.363	0.609	0.809
					12 months	-0.5	-0.25	1	0.00021	0.03413	0.0002	0.041	0.312	0.04	0.006	0.002	0.001	0.001	0.001	0.001	0.694	0.232	0.164	0.148	0.064	0.067	0.005	0.002	0.001	0.001	0.001	0.001	-0.14	0.37	3.136	0.363	3.079	3.131	0.348	3.077	3.061	-0.003	3.058	0.397	0.223	0.433	0.164	0.103	0.12
9	234	10	F	460	before OK	-2.25	0	0.2	0.00097	0.02106	0.00071	0.075	0.229	0.063	0.048	0.013	0.007	0.005	0.004	0.003	0.475	0.154	0.071	0.072	0.047	0.031	0.014	0.006	0.004	0.003	0.002	0.002	0.09	0.29	1.414	0.564	1.485	1.41	0.558	1.484	1.333	0.147	1.481	0.246	0.546	0.3	0.1	0.08	0.054
					1 month				0.01536	0.02304	0.02163	0.16	0.202	0.182	0.175	0.112	0.05	0.046	0.029	0.035	0.332	0.152	0.09	0.071	0.052	0.046	0.273	0.108	0.076	0.071	0.053	0.039	0.36	0.51	0.694	0.766	0.657	0.547	0.665	0.606	0.224	0.375	0.599	0.242	0.421	0.195	0.428	0.38	0.255
					3 months				0.01079	0.03046	0.01241	0.139	0.205	0.124	0.158	0.096	0.055	0.044	0.031	0.027	0.404	0.154	0.073	0.064	0.056	0.047	0.171	0.068	0.044	0.036	0.027	0.021	0.11	0.31	1.25	1.154	1.923	1.189	0.988	1.787	0.918	0.778	1.696	0.236	0.436	0.255	0.386	0.595	0.71
					12 months	-0.25	0	1.2	0.03679	0.01163	0.02486	0.219	0.159	0.178	0.354	0.168	0.101	0.071	0.057	0.047	0.256	0.086	0.07	0.033	0.036	0.018	0.251	0.152	0.107	0.076	0.051	0.031	0	0	0.551	1.016	1.169	0.519	0.954	1.133	0.416	0.646	1.062	0.222	0.276	0.332	0.186	0.349	0.289
10	254	9	F	790	before OK	-2.5	0	0.1	0.00056	0.05096	0.00054	0.057	0.268	0.059	0.022	0.006	0.003	0.002	0.002	0.001	0.516	0.234	0.141	0.087	0.066	0.054	0.019	0.007	0.004	0.003	0.002	0.002	0.05	0.22	2.087	0.452	1.757	2.074	0.429	1.753	2.01	-0.267	1.743	0.263	0.583	0.379	0.235	0.141	0.128
					1 month				0.04358	0.02474	0.03841	0.239	0.166	0.221	0.35	0.21	0.147	0.109	0.084	0.061	0.251	0.14	0.086	0.053	0.035	0.025	0.391	0.2	0.09	0.081	0.08	0.068	0.66	0.63	0.709	1.12	1.045	0.655	1.077	0.944	-0.26	1.022	0.763	0.113	0.62	0.666	0.271	0.305	0.447
					3 months				0.01537	0.01086	0.03362	0.164	0.138	0.199	0.177	0.092	0.072	0.048	0.038	0.03	0.191	0.082	0.049	0.039	0.026	0.02	0.306	0.18	0.112	0.078	0.061	0.052	0.89	0.69	0.87	1.208	1.353	0.817	1.113	1.218	0.275	0.875	1.151	0.233	0.39	0.302	0.299	0.47	0.588
					12 months	-0.25	-0.25	0.7	0.02451	0.10171	0.02484	0.206	0.327	0.169	0.331	0.131	0.114	0.065	0.055	0.041	0.46	0.331	0.258	0.207	0.167	0.135	0.247	0.134	0.083	0.055	0.039	0.03	0.25	0.45	0.588	0.634	1.145	0.536	0.575	1.079	0.467	0.546	1.013	0.272	0.379	0.19	0.242	0.268	0.383
11	268	8	M	839	before OK	-3.75	0	0.2	0.0002	0.01607	0.0002	0.044	0.212	0.041	0.013	0.005	0.002	0.002	0.001	0.001	0.422	0.115	0.077	0.067	0.039	0.032	0.009	0.004	0.002	0.001	0.001	0.001	-0.27	0.52	2.978	0.591	3.092	2.973	0.585	3.086	2.924	0.161	3.085	0.481	0.957	0.49	0.176	0.087	0.193
					1 month				0.00918	0.00465	0.00591	0.112	0.102	0.11	0.135	0.049	0.033	0.029	0.02	0.018	0.089	0.044	0.029	0.019	0.013	0.012	0.126	0.064	0.028	0.024	0.02	0.015	0.2	0.41	1.32	2.186	1.878	1.103	2.043	1.682	0.289	1.316	1.605	0.338	0.597	0.259	0.724	0.777	0.835
					3 months				0.01506	0.00481	0.02043	0.148	0.104	0.167	0.21	0.093	0.052	0.037	0.03	0.026	0.087	0.051	0.029	0.016	0.017	0.011	0.262	0.097	0.089	0.058	0.037	0.032	0.55	0.6	0.911	1.623	0.937	0.587	1.436	0.857	-0.535	1.299	0.765	0.455	0.611	0.157	0.696	0.757	0.379
					12 months	-0.75	-0.25	0.8	0.00023	0.03184	0.00028	0.047	0.26	0.052	0.013	0.003	0.002	0.002	0.001	0.001	0.545	0.21	0.112	0.078	0.058	0.048	0.015	0.006	0.003	0.002	0.002	0.001	-0.22	0.47	2.499	0.427	2.3	2.494	0.409	2.299	2.487	-0.242	2.244	0.059	0.329	0.375	0.158	0.121	0.087
12	272	14	F	861	before OK	-6.25	-1.5	0.1	9e-05	0.00456	0.0001	0.037	0.13	0.036	0.005	0.002	0.001	0.001	0.001	0	0.091	0.054	0.031	0.015	0.014	0.009	0.004	0.002	0.001	0.001	0	0	-0.16	0.4	4.262	0.965	4.457	4.254	0.963	4.449	4.178	0.17	4.348	0.389	0.579	0.193	0.262	0.061	0.27
					1 month				0.00016	0.00846	0.00021	0.04	0.166	0.037	0.008	0.003	0.002	0.001	0.001	0.001	0.657	0.411	0.259	0.175	0.122	0.094	0.006	0.002	0.001	0.001	0.001	0	-0.24	0.49	3.679	0.396	3.838	3.669	0.375	3.832	3.656	0.157	3.813	0.491	0.572	0.179	0.281	0.126	0.219
					3 months				0.00084	0.00944	0.00044	0.054	0.13	0.044	0.039	0.018	0.011	0.007	0.006	0.003	0.183	0.052	0.035	0.029	0.022	0.016	0.016	0.005	0.003	0.002	0.001	0.001	-0.26	0.51	3.092	1.201	3.963	3.059	1.186	3.946	3.055	0.744	3.799	0.406	0.425	0.08	0.454	0.187	0.365
					12 months	-0.75	-0.25	0.9	0.00368	0.02173	0.00224	0.073	0.154	0.061	0.079	0.032	0.016	0.008	0.004	0.002	0.218	0.12	0.075	0.049	0.034	0.025	0.058	0.022	0.009	0.003	0.001	0	-0.48	0.69	2.426	1.303	3.489	2.386	1.264	3.444	2.338	1.039	3.376	0.283	0.309	0.342	0.44	0.318	0.56
13	278	14	M	887	before OK	-5.5	0	0.1	0.00014	0.03505	9e-05	0.041	0.262	0.038	0.011	0.004	0.002	0.001	0.001	0.001	0.541	0.259	0.133	0.064	0.031	0.029	0.006	0.002	0.001	0.001	0.001	0	-0.24	0.49	2.932	0.496	4.208	3.927	0.487	4.204	3.909	0.226	4.135	0.399	0.601	0.244	0.212	0.094	0.19
					1 month				0.00244	0.01768	0.00023	0.047	0.104	0.105	0.019	0.005	0.002	0.001	0.001	0.001	0.099	0.056	0.037	0.027	0.021	0.017	0.137	0.075	0.048	0.03	0.018	0.009	-0.35	0.59	3.021	1.587	3.763	2.991	1.288	3.576	2.95	0.482	3.432	0.412	0.484	0.08	0.421	0.927	1.172
					3 months				0.00348	0.00478	0.00122	0.09	0.092	0.054	0.083	0.04	0.025	0.017	0.014	0.012	0.078	0.045	0.03	0.019	0.015	0.01	0.038	0.015	0.011	0.008	0.006	0.005	2	0.82	1.93	3.235	4.691	1.712	2.866	4.469	1.669	2.751	4.421	0.587	0.58	0.059	0.891	1.499	1.425
					12 months	-0.25	0	0.9	0.00408	0.0173	0.00204	0.08	0.132	0.065	0.078	0.039	0.023	0.017	0.013	0.01	0.231	0.094	0.043	0.028	0.021	0.017	0.051	0.02	0.012	0.008	0.006	0.004	2	0.82	7.234	12.561	7.336	3.321	10.133	6.97	-2.012	7.962	5.95	0.227	0.149	0.094	6.426	7.422	2.289
14	282	13	M	899	before OK	-6	-0.5	0.1	9e-05	0.02858	9e-05	0.039	0.225	0.038	0.007	0.003	0.001	0.001	0.001	0.001	0.438	0.144	0.09	0.07	0.05	0.041	0.005	0.002	0.001	0.001	0.001	0.001	-0.35	0.59	3.846	0.608	4.006	3.843	0.599	4.005	3.829	0.168	3.997	0.182	0.498	0.324	0.156	0.103	0.119
					1 month				0.00596	0.01336	0.02331	0.124	0.151	0.17	0.121	0.055	0.037	0.032	0.023	0.019	0.264	0.088	0.057	0.044	0.03	0.027	0.226	0.147	0.089	0.061	0.044	0.033	0.97	0.7	0.907	1.864	1.213	0.553	1.59	1.145	-0.327	1.385	1.059	0.211	0.384	0.498	0.719	0.972	0.401
					3 months				0.02613	0.00735	0.01021	0.15	0.12	0.116	0.164	0.099	0.066	0.042	0.041	0.034	0.126	0.059	0.032	0.027	0.023	0.021	0.171	0.077	0.036	0.022	0.016	0.013	0.16	0.37	1.022	1.411	1.7	0.713	0.991	1.612	0.696	0.89	1.586	0.206	0.486	0.354	0.732	1.005	0.539
					12 months	-0.5	-0.5	1.2	0.00592	0.00884	0.01595	0.101	0.105	0.136	0.106	0.04	0.03	0.022	0.019	0.016	0.093	0.04	0.037	0.022	0.018	0.017	0.179	0.075	0.042	0.041	0.031	0.022	0.55	0.6	1.18	2.001	1.264	0.74	1.544	1.025	-0.276	1.286	1.01	0.334	0.078	0.342	0.919	1.272	0.741
15	298	10	F	988	before OK	-2.75	0	0.1	0.00065	0.0631	0.00056	0.065	0.301	0.057	0.031	0.012	0.006	0.004	0.003	0.002	0.561	0.315	0.178	0.111	0.077	0.064	0.021	0.006	0.004	0.002	0.002	0.001	-0.45	0.67	1.643	0.483	1.85	1.635	0.465	1.847	1.622	0.213	1.835	0.236	0.402	0.293	0.16	0.13	0.092
					1 month				0.02116	0.03206	0.03007	0.161	0.184	0.199	0.261	0.084	0.086	0.055	0.041	0.041	0.3	0.163	0.076	0.066	0.067	0.059	0.383	0.103	0.074	0.049	0.051	0.046	0.48	0.57	1.211	1.451	0.501	1.067	1.306	0.319	-1.05	1.276	0.226	0.444	0.565	0.987	0.572	0.632	0.386
					3 months				0.01838	0.0129	0.01958	0.172	0.147	0.171	0.226	0.092	0.07	0.053	0.042	0.035	0.242	0.077	0.065	0.047	0.03	0.025	0.269	0.111	0.077	0.059	0.046	0.039	0.55	0.6	0.724	1.377	1.058	0.412	1.251	0.854	-0.344	1.164	0.819	0.767	0.331	0.77	0.595	0.577	0.626
					12 months	-0.25	0	1	0.02312	0.06212	0.00421	0.192	0.246	0.101	0.307	0.111	0.089	0.061	0.05	0.044	0.333	0.238	0.185	0.144	0.114	0.092	0.108	0.044	0.016	0.009	0.005	0.002	-0.06	0.24	0.72	1.108	1.565	0.578	1.024	1.485	0.42	1	1.42	0.291	0.206	0.393	0.429	0.421	0.494
16	304	10	F	1006	before OK	-4	-0.5	0.1	0.00028	0.01707	0.00028	0.046	0.206	0.043	0.011	0.004	0.002	0.002	0.001	0.001	0.461	0.069	0.069	0.057	0.027	0.023	0.007	0.003	0.002	0.001	0.001	0.001	-0.32	0.57	2.472	0.565	2.609	2.47	0.562	2.607	2.457	0.133	2.59	0.218	0.374	0.411	0.103	0.056	0.101
					1 month				0.02809	0.0159	0.01398	0.191	0.183	0.15	0.348	0.107	0.05	0.049	0.05	0.042	0.333	0.122	0.062	0.057	0.042	0.026	0.166	0.096	0.066	0.046	0.031	0.018	0.45	0.56	0.512	0.826	0.953	0.365	0.765	0.933	0.273	0.639	0.913	0.114	0.298	0.255	0.358	0.311	0.195
					3 months				0.01906	0.03388	0.01943	0.172	0.196	0.151	0.241	0.102	0.056	0.042	0.038	0.036	0.302	0.149	0.115	0.098	0.07	0.052	0.213	0.102	0.054	0.048	0.037	0.037	0.09	0.29	0.565	1.354	1.192	0.324	1.213	0.945	-0.221	1.132	0.91	0.309	0.321	0.611	0.463	0.601	0.727
					12 months	-0.25	0	1	0.01404	0.01702	0.02231	0.146	0.164	0.187	0.136	0.07	0.045	0.037	0.032	0.027	0.264	0.11	0.064	0.05	0.046	0.031	0.243	0.138	0.114	0.079	0.052	0.035	0.03	0.17	0.649	1.324	1.089	0.224	1.016	1.003	-0.031	0.977	0.946	0.095	0.338	0.432	0.609	0.849	0.426
17	310	13	M	1038	before OK	-5.75	-0.75	0.06	0.00013	0.02169	9e-05	0.04	0.232	0.038	0.008	0.003	0.002	0.001	0.001	0.001	0.489	0.136	0.094	0.074	0.042	0.034	0.005	0.002	0.001	0.001	0.001	0.001	0.1	0.3	3.682	0.549	3.871	3.672	0.539	3.864	3.668	0.166	3.833	0.388	0.027	0.399	0.267	0.105	0.221
					1 month				0.00055	0.01684	0.00151	0.087	0.208	0.073	0.054	0.017	0.01	0.006	0.004	0.004	0.411	0.116	0.07	0.062	0.038	0.029	0.049	0.008	0.004	0.003	0.003	0.002	-0.27	0.52	1.158	0.611	1.283	1.154	0.606	1.28	1.087	0.179	1.266	0.288	0.212	0.333	0.093	0.077	0.083
					3 months				0.00044	0.00768	0.01023	0.047	0.104	0.105	0.019	0.005	0.002	0.001	0.001	0.001	0.099	0.056	0.037	0.027	0.021	0.017	0.137	0.075	0.048	0.03	0.018	0.009	-0.35	0.59	3.021	1.587	3.763	2.991	1.288	3.576	2.95	0.482	3.432	0.4	0.123	0.463	0.421	0.927	1.172
					12 months	-0.75	-0.5	0.9	0.00057	0.01205	0.00597	0.05	0.139	0.087	0.017	0.004	0.002	0.001	0.001	0.001	0.177	0.086	0.053	0.038	0.028	0.023	0.101	0.044	0.025	0.014	0.008	0.004	-0.27	0.52	2.453	1.072	2.991	2.434	0.778	2.861	2.392	0.383	2.775	0.294	0.305	0.586	0.309	0.737	0.874
18	308	14	F	1043	before OK	-3.25	0	0.3	0.00046	0.0318	0.00046	0.055	0.267	0.051	0.016	0.006	0.003	0.002	0.001	0.001	0.558	0.237	0.093	0.078	0.072	0.052	0.012	0.004	0.002	0.001	0.001	0.001	-0.31	0.56	1.981	0.472	2.118	1.977	0.462	2.115	1.937	0.169	2.106	0.245	0.238	0.137	0.116	0.1	0.113
					1 month				0.01515	0.04544	0.00639	0.159	0.262	0.129	0.167	0.1	0.067	0.039	0.028	0.018	0.365	0.082	0.077	0.035	0.034	0.024	0.137	0.076	0.04	0.027	0.017	0.011	0.75	0.65	0.724	0.688	0.962	0.716	0.674	0.956	0.684	0.162	0.846	0.37	0.319	0.137	0.107	0.135	0.101
					3 months				0.02052	0.04635	0.03116	0.183	0.268	0.233	0.198	0.118	0.079	0.061	0.05	0.041	0.539	0.105	0.166	0.156	0.076	0.069	0.387	0.166	0.114	0.102	0.066	0.064	1.11	0.73	0.802	0.395	0.536	0.68	0.315	0.446	0.151	0.136	-0.015	0.519	0.561	0.156	0.425	0.238	0.297
					12 months	-0.25	-0.25	1.2	0.01231	0.01074	0.02661	0.144	0.15	0.222	0.228	0.091	0.051	0.039	0.029	0.02	0.209	0.1	0.043	0.036	0.027	0.022	0.365	0.18	0.096	0.084	0.06	0.051	0.74	0.65	1.281	1.166	0.419	1.179	1.004	0.249	-1.124	0.96	-0.164	0.341	0.089	0.282	0.499	0.592	0.337
19	313	10	M	1047	before OK	-3.25	-0.5	0.1	0.00035	0.01511	0.00031	0.052	0.207	0.047	0.014	0.007	0.003	0.002	0.002	0.001	0.415	0.103	0.075	0.059	0.034	0.03	0.01	0.004	0.002	0.002	0.001	0.001	-0.28	0.53	2.206	0.605	2.363	2.205	0.6	2.361	2.189	0.142	2.33	0.364	0.227	0.294	0.086	0.072	0.082
					1 month				0.00204	0.03397	0.01525	0.079	0.217	0.129	0.071	0.019	0.009	0.005	0.003	0.002	0.31	0.178	0.119	0.077	0.059	0.048	0.171	0.094	0.061	0.042	0.03	0.022	-0.18	0.42	1.446	0.721	1.761	1.424	0.638	1.706	1.42	0.151	1.706	0.703	1.307	0.615	0.249	0.337	0.436
					3 months				0.00237	0.03544	0.00307	0.073	0.247	0.077	0.061	0.022	0.01	0.005	0.003	0.002	0.412	0.194	0.13	0.103	0.075	0.063	0.071	0.025	0.012	0.007	0.004	0.002	-0.25	0.5	1.739	0.495	1.903	1.717	0.411	1.856	1.701	0.13	1.832	0.86	1.038	1.067	0.273	0.275	0.419
					12 months	-0.5	-0.25	0.8	0.00568	0.03462	0.00729	0.096	0.249	0.101	0.103	0.042	0.024	0.015	0.01	0.005	0.454	0.168	0.129	0.103	0.069	0.06	0.118	0.05	0.03	0.018	0.012	0.007	-0.25	0.5	1.379	0.5	1.606	1.359	0.434	1.555	1.332	0.212	1.544	0.359	0.489	0.697	0.232	0.249	0.399
20	315	10	M	1061	before OK	-3.5	-0.75	0.1	0.00031	0.0474	0.00028	0.049	0.132	0.046	0.015	0.005	0.003	0.002	0.001	0.001	0.105	0.057	0.034	0.017	0.015	0.012	0.009	0.003	0.002	0.001	0.001	0.001	-0.2	0.45	2.345	0.975	2.514	2.342	0.973	2.511	2.292	0.171	2.463	0.171	0.283	0.113	0.125	0.073	0.122
					1 month				0.01922	0.03642	0.02765	0.178	0.234	0.196	0.262	0.095	0.066	0.054	0.043	0.029	0.399	0.184	0.113	0.094	0.07	0.057	0.248	0.169	0.099	0.071	0.052	0.04	1.06	0.72	0.577	0.677	0.638	0.513	0.625	0.625	0.386	0.183	0.569	0.936	1.321	0.425	0.263	0.262	0.127
					3 months				0.00595	0.01216	0.00334	0.124	0.187	0.118	0.159	0.054	0.03	0.017	0.011	0.007	0.37	0.084	0.062	0.039	0.03	0.02	0.07	0.061	0.028	0.009	0.006	0.003	1.06	0.72	0.938	0.622	0.842	0.934	0.611	0.836	0.815	0.006	0.821	0.453	0.783	0.402	0.086	0.114	0.097
					12 months	0	0	1	0.01309	0.00898	0.03119	0.133	0.127	0.239	0.135	0.069	0.048	0.036	0.03	0.026	0.128	0.07	0.054	0.037	0.033	0.025	0.491	0.124	0.105	0.108	0.077	0.053	0.07	0.26	0.982	1.548	0.799	0.466	1.047	0.65	-0.463	0.994	0.531	0.358	0.546	0.188	0.864	1.141	0.464
21	328	12	M	1088	before OK	-3.25	-0.5	0.2	0.00046	0.02142	0.00035	0.056	0.228	0.051	0.026	0.009	0.005	0.003	0.002	0.002	0.483	0.138	0.074	0.073	0.047	0.033	0.013	0.006	0.003	0.002	0.002	0.001	-0.33	0.57	2.059	0.545	2.152	2.056	0.538	2.151	1.998	0.152	2.15	0.33	0.722	0.393	0.112	0.085	0.063
					1 month				0.00815	0.02244	0.00639	0.159	0.192	0.129	0.167	0.1	0.067	0.039	0.028	0.018	0.365	0.082	0.077	0.035	0.034	0.024	0.137	0.076	0.04	0.027	0.017	0.011	0.75	0.65	0.724	0.688	0.962	0.716	0.674	0.956	0.684	0.162	0.846	0.426	0.543	0.487	0.107	0.135	0.101
					3 months				0.03707	0.02596	0.031	0.185	0.188	0.215	0.273	0.135	0.118	0.082	0.067	0.063	0.344	0.118	0.096	0.074	0.051	0.045	0.346	0.166	0.111	0.076	0.059	0.047	0.45	0.56	1.452	1.493	0.539	1.343	1.231	0.319	-1.156	1.155	-0.001	0.62	0.637	0.328	0.552	0.845	0.434
					12 months	-0.5	-0.25	0.9	0.01863	0.07724	0.02114	0.189	0.267	0.2	0.291	0.124	0.084	0.055	0.053	0.035	0.407	0.289	0.203	0.139	0.098	0.076	0.269	0.181	0.095	0.072	0.049	0.045	-0.14	0.37	0.622	1.043	0.77	0.325	0.913	0.717	-0.203	0.899	0.695	0.654	0.746	0.718	0.53	0.505	0.261
22	334	10	M	1201	before OK	-4	0	0.2	0.00031	0.10225	0.00029	0.051	0.358	0.045	0.016	0.006	0.003	0.002	0.002	0.001	0.602	0.367	0.262	0.194	0.144	0.104	0.008	0.003	0.002	0.001	0.001	0.001	0.1	0.3	2.337	0.385	2.565	2.33	0.371	2.557	2.302	0.253	2.555	0.123	0.258	0.137	0.17	0.102	0.202
					1 month				0.00497	0.0257	0.00798	0.099	0.179	0.106	0.083	0.049	0.032	0.024	0.019	0.015	0.283	0.15	0.086	0.051	0.034	0.025	0.117	0.055	0.034	0.028	0.02	0.018	0.26	0.45	1.386	0.885	1.023	0.93	0.844	0.323	-0.797	0.797	0	0.309	0.631	0.51	1.027	0.268	0.97
					3 months				0.00735	0.03717	0.01682	0.111	0.198	0.181	0.17	0.068	0.044	0.029	0.021	0.016	0.362	0.154	0.08	0.059	0.054	0.054	0.197	0.115	0.08	0.058	0.048	0.038	-0.1	0.32	1.075	0.963	0.612	1.034	0.786	0.395	-0.979	0.782	-0.196	0.333	0.128	0.281	0.293	0.557	0.468
					12 months	-1.25	-0.25	0.6	0.00955	0.05617	0.01187	0.139	0.247	0.116	0.186	0.078	0.038	0.038	0.024	0.018	0.33	0.231	0.18	0.144	0.116	0.09	0.156	0.079	0.047	0.031	0.021	0.015	0.35	0.51	1.002	0.948	1.669	0.917	0.88	1.628	0.726	0.858	1.584	0.662	0.348	0.339	0.405	0.354	0.366
23	338	8	M	1224	before OK	-1.75	0	0.2	0.00185	0.01684	0.00151	0.087	0.208	0.073	0.054	0.017	0.01	0.006	0.004	0.004	0.411	0.116	0.07	0.062	0.038	0.029	0.049	0.008	0.004	0.003	0.003	0.002	-0.27	0.52	1.158	0.611	1.283	1.154	0.606	1.28	1.087	0.179	1.266	0.459	0.538	0.104	0.093	0.077	0.083
					1 month				0.01528	0.02873	0.00428	0.167	0.2	0.106	0.232	0.103	0.072	0.047	0.037	0.028	0.347	0.113	0.079	0.057	0.04	0.038	0.108	0.27	0.013	0.005	0.004	0.003	-0.01	0.1	0.829	0.632	0.917	0.822	0.619	0.912	0.659	0.236	0.895	0.499	0.549	0.09	0.113	0.126	0.09
					3 months				0.06042	0.02984	0.01544	0.292	0.219	0.156	0.493	0.296	0.194	0.129	0.086	0.061	0.425	0.175	0.081	0.049	0.039	0.035	0.227	0.107	0.055	0.032	0.018	0.011	-0.06	0.24	0.556	0.559	0.716	0.543	0.543	0.704	0.361	0.339	0.699	0.755	0.61	0.562	0.119	0.132	0.131
					12 months	-0.25	-0.25	0.2	0.00955	0.06477	0.00402	0.125	0.342	0.094	0.173	0.067	0.036	0.022	0.015	0.009	0.702	0.34	0.168	0.148	0.121	0.087	0.083	0.027	0.011	0.006	0.004	0.003	-0.08	0.28	1.158	0.343	1.191	1.124	0.312	1.177	1.088	0.039	1.126	0.309	0.703	0.395	0.278	0.142	0.183
24	355	10	M	1351	before OK	-2	-0.5	0.4	0.00075	0.1881	0.00068	0.068	0.212	0.061	0.031	0.012	0.007	0.005	0.003	0.002	0.394	0.123	0.098	0.05	0.048	0.032	0.017	0.007	0.004	0.003	0.002	0.002	-0.13	0.36	1.563	0.614	1.635	1.561	0.61	1.633	1.509	0.106	1.615	0.51	0.336	0.181	0.083	0.069	0.079
					1 month				0.01589	0.044	0.08475	0.19	0.211	0.304	0.279	0.152	0.105	0.074	0.052	0.035	0.314	0.193	0.132	0.093	0.065	0.045	0.651	0.292	0.127	0.089	0.087	0.09	0.33	0.5	0.898	0.911	0.231	0.847	0.881	0.08	-0.74	0.736	-0.004	0.602	0.339	0.557	0.297	0.23	0.216
					3 months				0.0157	0.0173	0.1414	0.165	0.174	0.413	0.248	0.117	0.053	0.038	0.029	0.022	0.311	0.104	0.052	0.04	0.032	0.026	0.764	0.474	0.249	0.193	0.191	0.168	0.48	0.57	0.886	0.872	0.179	0.873	0.831	0.078	-0.647	0.596	-0.051	0.769	0.687	0.4	0.151	0.262	0.161
					12 months	-0.25	0	1.5	0.01123	0.01691	0.0173	0.135	0.182	0.169	0.139	0.079	0.054	0.038	0.03	0.025	0.333	0.09	0.065	0.055	0.054	0.032	0.246	0.069	0.079	0.053	0.029	0.029	-0.08	0.28	0.854	0.972	0.643	0.274	0.741	0.58	-0.153	0.726	0.573	0.263	0.181	0.371	0.809	0.63	0.277
25	362	10	M	1381	before OK	-1	0	0.5	0.00614	0.02217	0.00374	0.151	0.222	0.112	0.166	0.079	0.052	0.036	0.025	0.018	0.485	0.122	0.064	0.061	0.045	0.028	0.078	0.042	0.022	0.013	0.009	0.007	-0.25	0.5	0.706	0.534	0.909	0.699	0.527	0.908	0.675	0.173	0.848	0.534	0.562	0.078	0.095	0.087	0.051
					1 month				0.0314	0.02848	0.04874	0.219	0.183	0.242	0.422	0.154	0.091	0.062	0.06	0.05	0.296	0.105	0.104	0.072	0.05	0.045	0.445	0.225	0.108	0.091	0.082	0.069	-0.16	0.4	0.583	1.038	0.814	0.347	0.906	0.739	-0.275	0.821	0.546	1.065	1.563	0.502	0.468	0.505	0.342
					3 months				0.04949	0.1531	0.03508	0.29	0.154	0.204	0.572	0.224	0.148	0.116	0.108	0.081	0.25	0.089	0.063	0.041	0.031	0.026	0.32	0.179	0.113	0.08	0.058	0.044	-0.09	0.3	0.344	1.134	0.902	0.262	1.017	0.813	-0.162	0.894	0.732	0.243	0.611	0.387	0.222	0.502	0.392
					12 months	0	0	1.5	0.00835	0.03417	0.01882	0.131	0.198	0.181	0.17	0.068	0.044	0.029	0.021	0.016	0.362	0.154	0.08	0.059	0.054	0.054	0.197	0.115	0.08	0.058	0.048	0.038	-0.1	0.32	1.075	0.963	0.612	1.034	0.786	0.395	-0.979	0.782	-0.196	0.192	0.329	0.497	0.293	0.557	0.468
26	413	6	F	1580	before OK	-1.75	0	0.1	0.0017	0.01857	0.00086	0.082	0.193	0.069	0.067	0.023	0.012	0.008	0.005	0.004	0.298	0.136	0.077	0.052	0.037	0.03	0.035	0.01	0.006	0.004	0.003	0.003	-0.38	0.62	1.53	0.738	1.407	1.524	0.723	1.404	1.361	0.043	1.404	0.329	0.575	0.246	0.136	0.152	0.081
					1 month				0.02232	0.047	0.00526	0.174	0.222	0.116	0.233	0.111	0.079	0.06	0.047	0.037	0.402	0.137	0.13	0.098	0.054	0.044	0.114	0.055	0.032	0.022	0.015	0.011	0.02	0.14	0.701	0.723	0.991	0.52	0.552	0.977	0.438	0.53	0.968	0.446	0.781	0.435	0.471	0.467	0.17
					3 months				0.02189	0.03198	0.09034	0.209	0.256	0.351	0.389	0.098	0.094	0.055	0.05	0.05	0.49	0.245	0.098	0.087	0.089	0.069	0.674	0.378	0.199	0.148	0.129	0.106	0.6	0.61	0.54	0.579	0.277	0.477	0.489	0.227	-0.311	0.402	0.09	0.157	0.436	0.289	0.252	0.31	0.159
					12 months	-0.5	-0.75	0.7	0.01696	0.01598	0.0032	0.169	0.2	0.111	0.241	0.127	0.065	0.047	0.031	0.027	0.409	0.085	0.085	0.043	0.034	0.033	0.131	0.05	0.023	0.012	0.006	0.004	-0.08	0.28	0.759	0.628	0.984	0.676	0.541	0.98	0.614	0.329	0.943	0.687	0.855	0.176	0.346	0.319	0.095
27	430	8	F	1631	before OK	-1.5	-0.5	0.3	0.00166	0.05265	0.00104	0.083	0.279	0.07	0.056	0.021	0.012	0.007	0.005	0.004	0.606	0.214	0.122	0.09	0.075	0.06	0.025	0.009	0.005	0.003	0.003	0.002	-0.04	0.2	1.227	0.431	1.362	1.224	0.422	1.36	1.201	0.128	1.329	0.205	0.413	0.211	0.095	0.084	0.07
					1 month				0.03253	0.01421	0.01404	0.202	0.18	0.157	0.235	0.172	0.131	0.1	0.077	0.055	0.222	0.108	0.066	0.053	0.046	0.035	0.238	0.085	0.071	0.053	0.032	0.021	0.7	0.64	1.036	0.666	1.275	0.97	0.583	1.223	0.863	-0.141	0.721	0.192	0.279	0.224	0.363	0.324	0.362
					3 months				0.01536	0.0611	0.02077	0.142	0.285	0.17	0.193	0.094	0.062	0.045	0.034	0.025	0.472	0.238	0.182	0.156	0.113	0.082	0.238	0.131	0.072	0.047	0.039	0.033	0.68	0.64	1.255	0.599	0.969	1.213	0.541	0.925	0.939	-0.428	0.512	0.226	0.457	0.239	0.323	0.257	0.291
					12 months	0	-0.5	1.2	0.00131	0.07504	0.00101	0.073	0.355	0.067	0.032	0.01	0.005	0.003	0.003	0.002	0.716	0.348	0.206	0.159	0.123	0.093	0.028	0.006	0.004	0.003	0.002	0.002	-0.23	0.48	1.499	0.279	1.468	1.481	0.21	1.464	1.452	-0.042	1.41	0.397	0.223	0.433	0.232	0.184	0.109
28	459	11	M	1639	before OK	-5	-0.75	0.1	0.00017	0.0297	0.00016	0.039	0.293	0.038	0.006	0.002	0.001	0.001	0.001	0.001	0.686	0.29	0.122	0.066	0.044	0.034	0.005	0.002	0.001	0.001	0.001	0.001	-0.24	0.49	3.347	0.382	3.351	3.341	0.374	3.346	3.333	-0.013	3.321	0.246	0.546	0.3	0.214	0.079	0.176
					1 month				0.01101	0.03234	0.00569	0.125	0.213	0.09	0.161	0.081	0.045	0.027	0.017	0.01	0.338	0.203	0.123	0.079	0.057	0.045	0.113	0.051	0.026	0.012	0.005	0.002	0	0	1.37	0.92	2.15	1.303	0.834	2.092	1.298	0.779	2.077	0.242	0.421	0.195	0.425	0.387	0.495
					3 months				0.02917	0.02242	0.00633	0.187	0.155	0.091	0.233	0.151	0.08	0.06	0.049	0.042	0.219	0.128	0.083	0.056	0.038	0.027	0.106	0.038	0.021	0.015	0.012	0.009	0.19	0.4	0.627	1.372	1.864	0.522	1.311	1.798	0.421	1.271	1.691	0.236	0.436	0.255	0.347	0.406	0.492
					12 months	-0.25	-0.5	1	0.04602	0.0287	0.01951	0.228	0.178	0.139	0.307	0.211	0.156	0.121	0.093	0.067	0.264	0.153	0.095	0.062	0.043	0.031	0.193	0.117	0.076	0.05	0.034	0.024	-0.01	0.1	0.804	1.067	1.837	0.77	1.01	1.769	0.764	0.951	1.715	0.222	0.276	0.332	0.23	0.345	0.494
29	511	15	M	1859	before OK	-7	-2	0.1	6e-05	0.01205	6e-05	0.036	0.167	0.036	0.004	0.002	0.001	0.001	0	0	0.297	0.078	0.037	0.025	0.018	0.013	0.004	0.002	0.001	0.001	0	0	-0.33	0.57	5.105	0.752	5.219	5.1	0.742	5.215	5.035	-0.033	5.002	0.263	0.583	0.379	0.223	0.122	0.203
					1 month	-5	-0.75		0.0001	0.0197	0.00016	0.039	0.293	0.038	0.006	0.002	0.001	0.001	0.001	0.001	0.686	0.29	0.122	0.066	0.044	0.034	0.005	0.002	0.001	0.001	0.001	0.001	-0.24	0.49	3.347	0.382	3.351	3.341	0.374	3.346	3.333	-0.013	3.321	0.113	0.62	0.666	0.214	0.079	0.176
					3 months				0.00016	0.02583	0.00018	0.04	0.207	0.039	0.008	0.003	0.002	0.001	0.001	0.001	0.364	0.144	0.112	0.069	0.062	0.045	0.005	0.002	0.001	0.001	0.001	0	-0.21	0.46	3.432	1.232	4.22	3.423	1.147	4.205	3.387	0.546	3.933	0.233	0.39	0.302	0.244	0.448	0.356
					12 months	-1.25	0	0.4	0.0002	0.01206	0.0004	0.042	0.147	0.046	0.008	0.003	0.002	0.001	0.001	0.001	0.151	0.089	0.06	0.045	0.036	0.028	0.008	0.0002	0.001	0.001	0.001	0.001	-0.1	0.32	3.012	1.584	3.992	3.001	1.417	3.933	2.969	0.589	3.557	0.272	0.379	0.19	0.262	0.707	0.683
30	514	12	M	1875	before OK	-1.25	-0.75	0.4	0.00718	0.11861	0.00287	0.13	0.448	0.104	0.154	0.074	0.044	0.028	0.019	0.012	0.803	0.574	0.38	0.23	0.136	0.103	0.086	0.037	0.017	0.011	0.007	0.005	-0.34	0.58	0.942	0.186	1.021	0.936	0.086	1.015	0.851	0.082	0.934	0.481	0.957	0.49	0.106	0.165	0.104
					1 month				0.0222	0.07908	0.05713	0.215	0.313	0.305	0.341	0.174	0.105	0.067	0.051	0.038	0.516	0.346	0.231	0.149	0.102	0.067	0.57	0.243	0.204	0.141	0.106	0.078	0.18	0.39	0.595	0.543	0.374	0.537	0.455	0.337	-0.454	0.403	-0.051	0.338	0.597	0.259	0.256	0.296	0.164
					3 months				0.05626	0.06738	0.00519	0.261	0.3	0.128	0.413	0.219	0.168	0.126	0.098	0.077	0.572	0.344	0.182	0.093	0.077	0.069	0.168	0.038	0.038	0.021	0.008	0.006	0.14	0.35	0.643	0.512	0.919	0.578	0.388	0.912	0.417	0.368	0.786	0.455	0.611	0.157	0.282	0.333	0.112
					12 months	-0.25	0	1.5	0.02758	0.0089	0.02579	0.217	0.143	0.209	0.357	0.16	0.094	0.072	0.057	0.046	0.198	0.1	0.041	0.031	0.027	0.022	0.36	0.152	0.111	0.077	0.06	0.053	0.01	0.1	0.449	1.388	1.318	0.304	1.105	1.147	-0.077	1.062	0.986	0.059	0.329	0.375	0.331	0.839	0.649
31	521	9	F	1919	before OK	-4.5	-1.5	0.4	0.00015	0.04069	0.00018	0.04	0.242	0.042	0.006	0.002	0.001	0.001	0.001	0.001	0.433	0.202	0.118	0.084	0.059	0.046	0.007	0.002	0.001	0.001	0.001	0.001	-0.36	0.6	3.365	0.595	3.408	3.36	0.573	3.399	3.312	-0.102	3.21	0.389	0.579	0.193	0.184	0.16	0.235
					1 month				0.00131	0.07504	0.00101	0.073	0.355	0.067	0.032	0.01	0.005	0.003	0.003	0.002	0.716	0.348	0.206	0.159	0.123	0.093	0.028	0.006	0.004	0.003	0.002	0.002	-0.23	0.48	1.499	0.279	1.468	1.481	0.21	1.464	1.452	-0.042	1.41	0.491	0.572	0.179	0.232	0.184	0.109
					3 months				0.00307	0.02115	0.00236	0.073	0.149	0.072	0.061	0.029	0.019	0.014	0.011	0.009	0.173	0.11	0.072	0.056	0.044	0.036	0.06	0.032	0.017	0.011	0.008	0.006	-0.4	0.63	2.708	1.471	3.086	2.534	1.381	2.909	2.386	0.468	2.854	0.406	0.425	0.08	0.956	0.506	1.029
					12 months	-1	-0.25	0.6	0.0024	0.01268	0.00584	0.067	0.111	0.091	0.054	0.026	0.017	0.01	0.008	0.006	0.16	0.07	0.033	0.023	0.022	0.019	0.101	0.04	0.032	0.019	0.015	0.013	0.91	0.69	4.092	1.149	3.996	3.575	0.573	3.377	3.426	-0.346	3.08	0.283	0.309	0.342	1.991	0.996	2.136
32	533	14	M	1936	before OK	-3.5	-0.5	0.1	0.00026	0.18146	0.00024	0.046	0.499	0.044	0.011	0.005	0.003	0.002	0.001	0.001	0.808	0.579	0.427	0.317	0.245	0.201	0.01	0.003	0.002	0.001	0.001	0.001	-0.17	0.41	2.547	0.245	2.607	2.54	0.227	2.605	2.533	0.041	2.574	0.399	0.601	0.244	0.183	0.091	0.115
					1 month				0.01212	0.00775	0.01434	0.134	0.101	0.123	0.128	0.076	0.05	0.041	0.03	0.024	0.067	0.056	0.036	0.021	0.022	0.015	0.111	0.073	0.04	0.03	0.023	0.02	0.29	0.47	1.082	2.482	1.727	0.895	2.034	1.177	-0.554	1.558	1.003	0.412	0.484	0.08	0.608	1.422	1.265
					3 months				0.07908	0.03806	0.06178	0.333	0.216	0.24	0.668	0.289	0.203	0.162	0.103	0.083	0.3	0.194	0.142	0.107	0.078	0.055	0.35	0.246	0.175	0.124	0.091	0.073	0.04	0.2	0.284	0.888	0.967	0.213	0.854	0.914	0.02	0.837	0.857	0.587	0.58	0.059	0.189	0.246	0.316
					12 months	-0.5	-0.25	1.5	0.09017	0.03508	0.02564	0.343	0.201	0.181	0.697	0.392	0.183	0.113	0.101	0.088	0.268	0.179	0.135	0.103	0.075	0.051	0.288	0.177	0.101	0.055	0.041	0.034	-0.04	0.2	0.242	1.065	1.157	0.153	1.023	1.104	0.051	1.01	1.061	0.227	0.149	0.094	0.188	0.296	0.347
33	550	10	F	2007	before OK	-2.25	0	0.2	0.00093	0.05168	0.0008	0.066	0.367	0.06	0.026	0.009	0.004	0.003	0.002	0.002	0.784	0.447	0.199	0.113	0.094	0.076	0.018	0.006	0.004	0.003	0.002	0.001	-0.05	0.5	1.563	0.266	1.593	1.554	0.243	1.589	1.535	0.048	1.583	0.182	0.498	0.324	0.166	0.108	0.11
					1 month				0.0032	0.0637	0.00042	0.076	0.28	0.052	0.062	0.027	0.016	0.01	0.006	0.004	0.504	0.311	0.172	0.09	0.088	0.091	0.011	0.003	0.002	0.002	0.001	0.001	-1.03	1.01	1.684	0.682	2.186	1.67	0.572	2.169	1.629	0.526	2.155	0.211	0.384	0.498	0.217	0.371	0.274
					3 months				0.0108	0.02762	0.00494	0.123	0.174	0.097	0.076	0.078	0.056	0.023	0.032	0.021	0.28	0.132	0.074	0.059	0.051	0.045	0.111	0.055	0.033	0.021	0.013	0.008	-0.11	0.33	0.992	1.668	1.848	0.706	1.41	1.779	0.478	1.294	1.772	0.206	0.486	0.354	0.697	0.891	0.501
					12 months	0	0	1.5	0.00049	0.06263	0.00041	0.056	0.271	0.048	0.027	0.008	0.004	0.003	0.002	0.002	0.521	0.252	0.121	0.101	0.086	0.076	0.008	0.002	0.002	0.001	0.001	0.001	0.26	0.45	2.177	0.492	2.537	2.173	0.372	2.523	2.146	0.361	2.507	0.334	0.078	0.342	0.127	0.322	0.265
34	603	10	F	2102	before OK	-4	0	0.2	0.00022	0.12719	0.00021	0.044	0.428	0.044	0.009	0.004	0.002	0.001	0.001	0.001	0.835	0.547	0.296	0.167	0.138	0.123	0.008	0.003	0.002	0.001	0.001	0.001	-0.43	0.66	2.777	0.21	2.701	2.766	0.185	2.696	2.762	-0.07	2.692	0.236	0.402	0.293	0.243	0.099	0.173
					1 month				0.02309	0.02277	0.01739	0.198	0.202	0.209	0.263	0.138	0.084	0.079	0.055	0.048	0.417	0.093	0.907	0.069	0.025	0.04	0.347	0.178	0.099	0.066	0.048	0.034	0.77	0.66	0.492	0.824	0.678	0.231	0.629	0.65	-0.026	0.617	0.591	0.444	0.565	0.987	0.435	0.532	0.193
					3 months				0.00917	0.03508	0.02564	0.143	0.201	0.181	0.697	0.392	0.183	0.113	0.101	0.088	0.268	0.179	0.135	0.103	0.075	0.051	0.288	0.177	0.101	0.055	0.041	0.034	-0.04	0.2	0.242	1.065	1.157	0.153	1.023	1.104	0.051	1.01	1.061	0.767	0.331	0.77	0.188	0.296	0.347
					12 months	-0.5	0	1.2	0.008	0.02329	0.00211	0.121	0.2	0.071	0.101	0.056	0.04	0.03	0.024	0.019	0.412	0.116	0.086	0.074	0.032	0.03	0.055	0.018	0.009	0.004	0.002	0.001	0.41	0.54	1.113	1.041	1.744	0.92	0.823	1.733	0.884	0.789	1.672	0.291	0.206	0.393	0.626	0.638	0.192
35	591	11	F	2075	before OK	-4.5	-0.5	0.1	0.00023	0.14119	0.00021	0.045	0.417	0.042	0.014	0.005	0.003	0.002	0.001	0.001	0.689	0.456	0.332	0.245	0.188	0.153	0.008	0.003	0.002	0.001	0.001	0.001	-0.35	0.59	2.685	0.346	2.859	2.68	0.292	2.853	2.655	0.183	2.838	0.218	0.374	0.411	0.17	0.187	0.186
					1 month				0.01212	0.00775	0.01434	0.134	0.101	0.123	0.128	0.076	0.05	0.041	0.03	0.024	0.067	0.056	0.036	0.021	0.022	0.015	0.111	0.073	0.04	0.03	0.023	0.02	0.29	0.47	1.082	2.482	1.727	0.895	2.034	1.177	-0.554	1.558	1.003	0.114	0.298	0.255	0.608	1.422	1.265
					3 months				0.01312	0.01028	0.01728	0.145	0.119	0.157	0.185	0.078	0.06	0.047	0.035	0.027	0.135	0.067	0.028	0.029	0.023	0.02	0.219	0.096	0.069	0.051	0.043	0.034	0.47	0.57	1.114	2.455	2.216	0.906	1.996	1.777	-0.286	1.706	1.42	0.309	0.321	0.611	0.648	1.429	1.324
					12 months	-0.5	-0.5	1.2	0.01834	0.01869	0.02527	0.145	0.171	0.171	0.157	0.076	0.061	0.03	0.034	0.028	0.302	0.092	0.074	0.061	0.047	0.04	0.261	0.124	0.067	0.061	0.053	0.042	-0.01	0.1	0.684	1.505	1.314	0.377	1.218	1.221	-0.113	1.116	1.003	0.095	0.338	0.432	0.571	0.884	0.485
36	593	9	F	2081	before OK	-3.5	-0.5	0.1	0.0019	0.03653	0.001	0.062	0.305	0.056	0.042	0.017	0.009	0.006	0.003	0.001	0.649	0.248	0.152	0.119	0.095	0.068	0.035	0.01	0.005	0.002	0.001	0.001	-0.39	0.62	2.135	0.358	2.111	2.125	0.318	2.105	2.113	-0.01	2.103	0.388	0.027	0.399	0.2	0.163	0.158
					1 month				0.01167	0.0621	0.01212	0.157	0.292	0.159	0.214	0.093	0.065	0.045	0.031	0.024	0.558	0.191	0.189	0.112	0.113	0.099	0.257	0.067	0.077	0.031	0.025	0.016	0.71	0.64	0.835	0.387	0.826	0.827	0.305	0.797	0.736	0.022	0.758	0.288	0.212	0.333	0.117	0.239	0.219
					3 months				0.0138	0.04762	0.0894	0.323	0.254	0.156	0.176	0.078	0.056	0.023	0.032	0.021	0.28	0.132	0.074	0.059	0.051	0.045	0.111	0.055	0.033	0.021	0.013	0.008	-0.11	0.33	0.992	1.668	1.848	0.706	1.41	1.779	0.478	1.294	1.772	0.4	0.123	0.463	0.697	0.891	0.501
					12 months	-0.75	0	1.2	0.01661	0.05019	0.00888	0.152	0.274	0.149	0.222	0.121	0.07	0.048	0.033	0.022	0.527	0.22	0.151	0.105	0.086	0.055	0.141	0.117	0.062	0.04	0.024	0.014	1.01	0.71	0.967	0.341	0.886	0.95	0.193	0.859	0.917	-0.062	0.855	0.294	0.305	0.586	0.181	0.281	0.221
[truncated: 9 more columns]

## Sheet: Sheet2
-4	-0.25	13
-1	0	10
-1	0	13
-5	-0.5	14
-2.5	0	12
-2	-0.25	8
-3.25	-0.75	11
-4.25	-0.5	8
-2.25	-0.25	10
-2.5	-0.25	9
-3.75	-0.75	8
-6.25	-0.75	14
-5.5	-0.25	14
-6	-0.5	13
-2.75	-0.25	10
-4	-0.25	10
-5.75	-0.75	13
-3.25	0	14
-3.25	-0.5	10
-3.5	0	10
-3.25	-0.5	12
-4	-1.25	10
-1.75	-0.25	8
-2	-0.25	10
-1	0	10
-1.75	-0.5	6
-1.5	0	8
-5	-0.25	11
-7	-1.25	15
-1.25	-0.25	12
-4.5	-1	9
-3.5	-0.5	14
-2.25	0	10
-4	-0.5	10
-4.5	-0.5	11
-3.5	-0.75	9
-3.40278		10.8056		10.806
		2.18352		2.184
